# Supplementary material for: Identification and characterization of a mosquito-specific eggshell organizing factor in Aedes aegypti mosquitoes
Source: PLoS Biol. 2019 Jan 8;17(1):e3000068. doi: 10.1371/journal.pbio.3000068 (PMC6324781; doi:10.1371/journal.pbio.3000068)
Supplement: S3 Table — (XLSX) [file pbio.3000068.s011.xlsx]

## Sheet: S3 Table
	S3 Table. Gene-specific primers for DNA template used in in situ hybridization probe synthesis.
	Genes	Probe template	Forward primer (5' - 3')	Reverse primer (5' - 3')
	EOF1	sense	*AGCCCGTCCAAGAGGAAGTT	CTCGGATGGTACTCACACAA
	EAT35439	anti-sense	AGCCCGTCCAAGAGGAAGTT	*CTCGGATGGTACTCACACAA
	15a1	sense	*TTCCCATCCAACTCAGTAACCAT	TTCCGCTGCATCTTCAAGAG
	XP_001663218	anti-sense	TTCCCATCCAACTCAGTAACCAT	*TTCCGCTGCATCTTCAAGAG
	15a2	sense	*CCAGCGTGGTACAACAGTAAATC	CCGTTCCTTGGTCCTGGTTC
	XP_011493693	anti-sense	CCAGCGTGGTACAACAGTAAATC	*CCGTTCCTTGGTCCTGGTTC
	15a3	sense	*CGGAAGGAATCCATCCAACTT	CAGTCCAATCGATGATCCGC
	XP_001649022	anti-sense	CGGAAGGAATCCATCCAACTT	*CAGTCCAATCGATGATCCGC
	*T7 promoter sequence (5' TAATACGACTCACTATAGGGAGA 3') was added in 5' end of each primer.
